# Supplementary material
Source: publisher site journal article supplement (https://static.cambridge.org/content/id/urn:cambridge.org:id:article:S002205071700078X/resource/name/S002205071700078X_supp1.docx)
Supplement: Supplementary file 1 [file S002205071700078X_supp1.docx]

*Online Appendix*

Table A1

DISTRIBUTION OF LAND (HECTARES) DEVOTED
TO CITRUS IN SOUTH ITALY BETWEEN 1853–1885

| Provinces | 1853 | 1885 |
| --- | --- | --- |
| Palermo | 2,912 | 6,458 |
| Messina | 2,762 | 7,743 |
| Catania | 566 | 7,628 |
| Siracusa | 424 | 2,609 |
| Other | 1,027 | 2,606 |
| Total | 7,691 | 26,844 |

*Source*: Lupo (1990).

| Table A2  EXPORTS FROM THE HARBOR OF MESSINA IN 1850   | Product | Quantity | Units | Lire | Description | | | --- | --- | --- | --- | --- | --- | | Silk | 1,100 | Balle | 4,469,850 | Oz 645 x Balla | | | Olive oil | 320,000 | Cafissi | 2,419,200 | Approx 3 litres x Cafisso | | | Oranges | 500,000 | Casse | 2,726,325 | Approx 240 oranges x cassa. | | | Lemons | 600,000 | Casse | 3,779,622 | Approx 360 lemons x cassa | | | Lemon juices | 1,000 | Barili | 503,986 | Oz 40 per barile | | | Salted lemons | 200 | Barili | 151,200 | Oz 6 per barile | | | Citrus perfumes | 400,000 | Libre | 2,014,740 |  |  | | Sulphur | 90,000 | Quintali | 302,211 |  |  | | Wheat | 50,000 | Salme | 2,477,790 |  |  | | Flax | 20,000 | Salme | 1,007,937 | 4 salma = 2 hl | | | Wine | 2,000 | Salme | 37,800 | 1/2 salma= 801 hl | | | Nuts | 4,000 | Salme | 655,169 | 4 salma = 3 hl | | | Almond | 20,000 | Cantaia | 1,763,370 | Oz 7 x cantaio | | | Pistachio | 200 | Cantaia | 30,240 | Oz 12 x Cantaio | | | Walnuts | 2,000 | Salme | 50,387 | 4 salma = 3 hl | | | Liquorice | 16,000 | Cantaia | 680,400 | Oz 9 per cantaio | | | Sardines | 4,000 | Barili | 151,162 | Oz 2 per Barile | | | Carob | 4,000 | Sacchi | 90,720 | 24 sacchi = 90Kg | | | Wool | 2,000 | Cantaia | 453,600 | 6 cantaio = 80Kg | | | Linen | 7,000 | Quintali | 264,600 | Oz 3 x quintali | | | Cotton | 4,000 | Quintali | 30,240 |  |  |   *Source*: Battaglia (2003).  Table A3  DESCRIPTIVE STATISTICS FOR POLITICAL ORGANIZATION ACROSS PROVINCES  BEFORE THE ITALIAN UNIFICATION IN 1860   |  |  | Political Organization: | | | | | --- | --- | --- | --- | --- | --- | | Province | Towns | Feudal | Crown-Ruled | Church-Ruled | Frac. Policies | | Caltanissetta | 12 | 0.833 | 0.167 | 0 | 0.071 | | Catania | 31 | 0.452 | 0.29 | 0 | 0.625 | | Girgenti | 24 | 0.583 | 0.125 | 0 | 0.714 | | Messina | 28 | 0.357 | 0.25 | 0.214 | 0.285 | | Palermo | 30 | 0.566 | 0.167 | 0.133 | 0.346 | | Siracusa | 22 | 0.818 | 0.181 | 0 | 0.5 | | Trapani | 15 | 0.666 | 0.333 | 0 | 0.285 | | Total | 162 | 0.574 | 0.216 | 0.0617 | 0.413 |   Numbers in the table refer to the share of towns within each province that were characterized by feudal organization, was crown- or church-ruled, or had a substantial degree of fractionalization polices. Each of the variables of Political organization is a binary dummy.  *Source*: Damiani (1886). |
| --- | --- | --- | --- | --- | --- | --- | --- | --- | --- | --- | --- | --- | --- | --- | --- | --- | --- | --- | --- | --- | --- | --- | --- | --- | --- | --- | --- | --- | --- | --- | --- | --- | --- | --- | --- | --- | --- | --- | --- | --- | --- | --- | --- | --- | --- | --- | --- | --- | --- | --- | --- | --- | --- | --- | --- | --- | --- | --- | --- | --- | --- | --- | --- | --- | --- | --- | --- | --- | --- | --- | --- | --- | --- | --- | --- | --- | --- | --- | --- | --- | --- | --- | --- | --- | --- | --- | --- | --- | --- | --- | --- | --- | --- | --- | --- | --- | --- | --- | --- | --- | --- | --- | --- | --- | --- | --- | --- | --- | --- | --- | --- | --- | --- | --- | --- | --- | --- | --- | --- | --- | --- | --- | --- | --- | --- | --- | --- | --- | --- | --- | --- | --- | --- | --- | --- | --- | --- | --- | --- | --- | --- | --- | --- | --- | --- | --- | --- | --- | --- | --- | --- | --- | --- | --- | --- | --- | --- | --- | --- | --- | --- | --- | --- | --- | --- | --- | --- | --- | --- | --- | --- | --- | --- | --- | --- | --- | --- | --- | --- | --- | --- | --- | --- | --- | --- | --- | --- | --- | --- | --- | --- | --- |

Table A4

LAND FRACTIONALIZATION AND SCALE OF PLANTATIONS BY PROVINCE IN 1881–1886

|  |  | Fractionalization  of Ownership | | Scale of Plantation | |
| --- | --- | --- | --- | --- | --- |
| Province | Towns | High | Low | Large | Small | |
| Caltanissetta | 12 | 0.545 | 0.454 | 0.333 | 0.5 | |
| Catania | 23 | 0.409 | 0.227 | 0.26 | 0.695 | |
| Girgenti | 14 | 0.461 | 0.461 | 0.357 | 0.461 | |
| Messina | 20 | 0.277 | 0.444 | 0.35 | 0.789 | |
| Palermo | 26 | 0.52 | 0.16 | 0.461 | 0.576 | |
| Siracusa | 20 | 0.35 | 0.5 | 0.35 | 0.666 | |
| Trapani | 14 | 0.333 | 0.333 | 0.285 | 0.923 | |
| Total | 129 | 0.413 | 0.347 | 0.348 | 0.661 | |  |

Numbers in the table refer to the share of towns within each province that were characterized by high or low fractionalization in land ownership and large or small plantations.

*Source*: Damiani (1886).

| Table A5  DESCRIPTIVE STATISTICS FOR ROBUSTNESS ANALYSIS | | | | | |
| --- | --- | --- | --- | --- | --- |
| Variable | | Obs. | Mean | Std. Dev. | Min. | Max. | |
| Mafia intensity (Cutrera 1900) | | 289 | 1.435986 | 1.128953 | 0 | 3 | |
| Mafia intensity (IDW interpolation) | | 391 | 1.264872 | 0.9225032 | 0 | 2.956452 | |
| Citrus suitability | | 382 | 0.3487664 | 0.1362065 | 0 | 1 | |
| Olive suitability | | 391 | 0.65047 | 0.2441069 | 0 | 1 | |
| Wheat suitability | | 391 | 0.5571812 | 0.2065363 | 0 | 1 | |
| Sulfur (dummy) | | 380 | 0.1368421 | 0.3441337 | 0 | 1 | |
| Grape (dummy) | | 359 | 0.8857939 | 0.3185054 | 0 | 1 | |
| *Source*: Cutrera (1900) and authors’ calculation. | |  |  |  |  |  | |

Table A6

OLS REGRESSIONS WITH ADDITIONAL CONTROLS

|  | Dependent Variable: | | | | |
| --- | --- | --- | --- | --- | --- |
| Mafia (in 1880) | | | | |
|  | (1) | (2) | (3) | (4) | (5) |
| Citrus | 0.203** | 0.213*** | 0.197** | 0.264*** | 0.233*** |
|  | (0.079) | (0.078) | (0.085) | (0.078) | (0.087) |
| Fractionalization policies | 0.241*** | 0.232*** | 0.259*** | 0.273*** | 0.249** |
|  | (0.086) | (0.087) | (0.094) | (0.088) | (0.103) |
| Large scale plantation | 0.260*** | 0.266*** | 0.262*** | 0.247*** | 0.154 |
|  | (0.084) | (0.083) | (0.088) | (0.084) | (0.098) |
| Distance from Palermo (in log) | –0.070 |  |  |  |  |
|  | (0.072) |  |  |  |  |
| Distance from Mazzaro del Valle (in log) | –0.036 |  |  |  |  |
|  | (0.092) |  |  |  |  |
| Feudal |  | 0.039 |  |  |  |
|  |  | (0.090) |  |  |  |
| Distance from the railway | | | –0.035 |  |  |
|  |  |  | (0.029) |  |  |
| Not care of law (dummy) | | |  | 0.213 |  |
|  |  |  |  | (0.134) |  |
| Mistrust in law (dummy) | | |  | 0.225 |  |
|  |  |  |  | (0.218) |  |
| Trust in law (dummy) | |  |  | 0.095 |  |
|  |  |  |  | (0.093) |  |
| Length of contract (in log) | | |  |  | –0.134** |
|  |  |  |  |  | (0.056) |
| Province dummies | Yes | Yes | Yes | Yes | Yes |
| Observations | 120 | 118 | 113 | 113 | 101 |
| R-squared | 0.285 | 0.292 | 0.268 | 0.303 | 0.248 |

*Notes*: The estimator is OLS in all specifications. Robust standard errors in parentheses. *** p<0.01 ** p<0.05

* p<0.1

*Source*: Authors’ calculation.


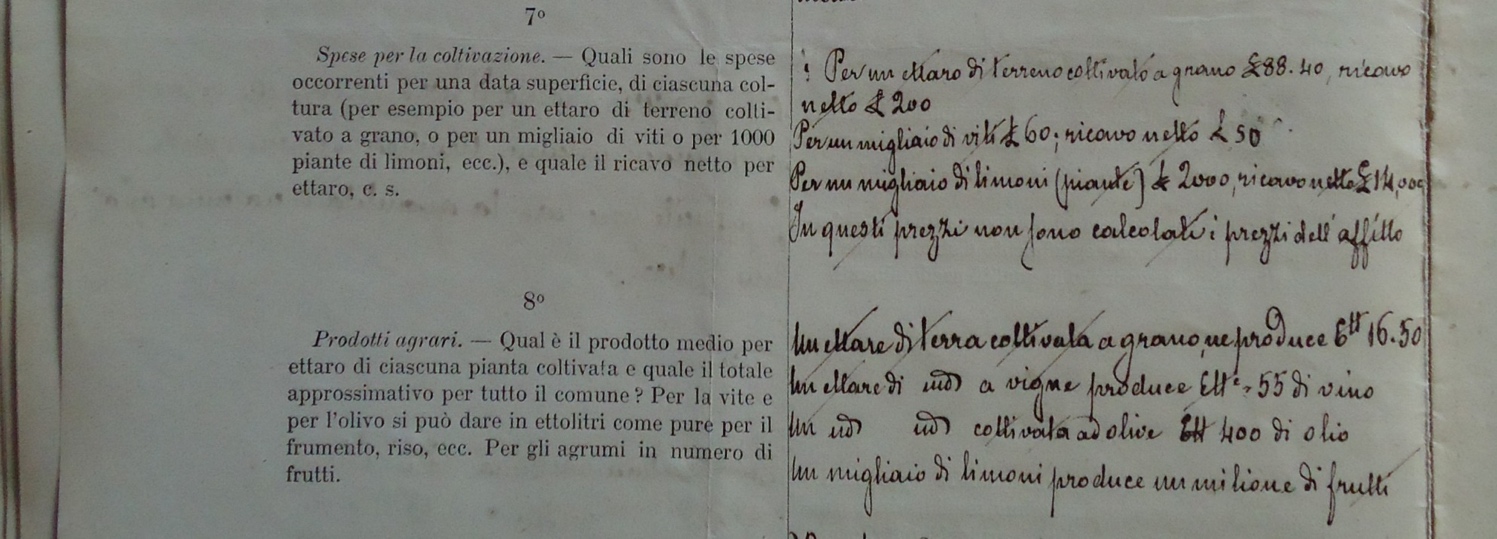


Figure A1

COSTS AND PROFITS PER CROPS

*Notes*: The figure reports costs and profits (Question 7) for wheat (first row), grape (second row), and citrus (third row) for a typical municipality from the Damiani Inquiry. Costs for wheat are 88.40 lire and the profit is lire 200. Costs for grape is lire 60 and profit is 50 lire. Costs for citrus is lire 2000 and the profit is lire 14,000.

*Source*: Damiani, 1886.

Figure A2

VARIABLES IN THE ORIGINAL INQUIRY DAMIANI (1886) RELATED TO MAFIA

*Note*: Figure A2 shows a picture of the second part of the table from which we got data on mafia. The first row reports variables. Starting from the left, the first variable is Scostumatezza (lewdness). There are three possible causes among which the prefect can choose. The first one is Adulterio (adultery), the second Incesto (incest), the third is Nascite Illegali (illegally born child), and the last one is Varie (various). The second variable relates to the religiousness of people in the town, the third one relates to the clergy (corrupt or exemplary), and the fourth variable regards perjury. The last variable is Vagabondaggio accattonaggio (vagrancy and begging). The fifth variable is the one we use to get information on mafia. The variable is labelled Reati (crimes) and then it is asked what the most common crimes are and the extent of these crimes. Most of the time, pretori only answered providing information on the sort of crime committed. The most common forms of crime were rustling, mafia, bloody crimes, and bloody crimes for passion. In addition, poverty was described as the most common cause of crime.

*Source*: Damiani (1886).


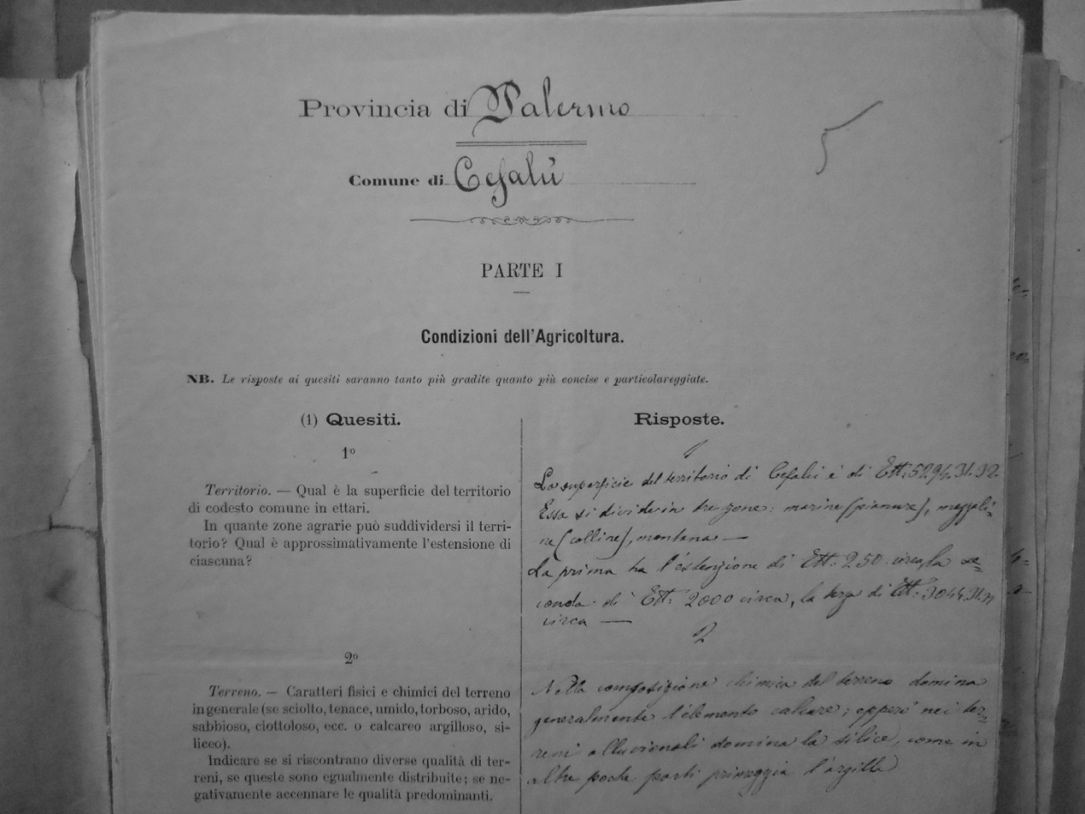


Figure A3

INCHIESTA AGRICOLA (AGRICULTURAL INQUIRY) IN DAMIANI (1886)

*Note*:Figure A3 shows the first page of the Agricultural Inquiry for the city of Cefalu. The column on the left reports the question (Quesiti). The column on the right reports the answer of the mayor. For example, the first question asks “What is the surface area of the city?,” “In how many areas the territory can be divided?,” and “What is the extent of each area?” The mayor answers that the surface land of Cefalu is 52,943,492 sq.mt. and the territory is divided in three zones: (1) plain, (2) hills, and (3) mountains. The first zone extends for almost 2,500,000 sq.mt., the second for almost 20,000,000 sq.mt., and the third for almost 30,443,492 sq.mt. The second question relates to the physical and chemical characteristics of the territory. This first part of the inquiry which is titled the Condition of Agriculture also reports information on the kind of crops produced, the sort of manufactures developed in the city, and so on. The second part of the Inquiry relates to the relationship between peasants and landlords, while the third part regards the moral conditions of peasants.

*Source*: Damiani (1886).

Figure A4: CUTRERA’S MAP

*Source*: Cutrera (1900).


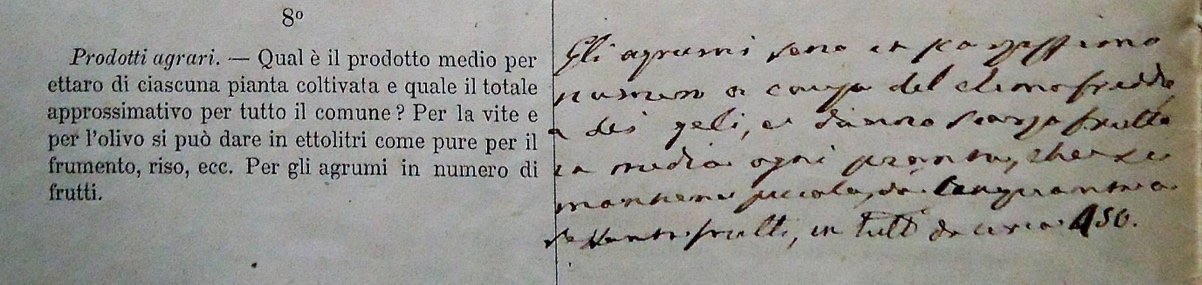


| *Agricultural Products—*What is the average product for each cultivation? What is the overall product for the town? For grape and olive quantities can be expressed in hectolitres; for citrus fruits in numbers. | *The citrus fruits tend to be scarce because of the cold climate and because of the frost…* |
| --- | --- |

Figure A5

MAYOR OF BISACQUINO ARGUING THAT CITRUS ARE IN SHORT SUPPLY BECAUSE
OF THE COLD CLIMATE AND FROST

*Source*: Damiani (1886).

| Table A7  VARIABLE DESCRIPTIONS | | |
| --- | --- | --- |
| Variables | Description | Source |
| Mafia | Dummy variable for whether the pretori reports mafia as one of the most common form of crimes.  The relevant question in the Inquiry is: *What is the most important form of crime?* | Damiani (1886). Original surveys completed by pretori. |
| Citrus, grape, olive, wheat | Dummy Variable proxying the most important crop produced in the town.  The questions in the Inquiry are:  *Q5) What is the dominant crop in the town?*  *Q8) What is the average yield per hectare of each cultivated plan and the total for the town? For the citrus what is the number?* | Damiani (1886). Original surveys completed by mayors excepted for the Province of Caltanissetta for which we use the summary Report (Damiani).  Di Vita (1905) is used to integrate missing information in Damian whenever possible. |
| Frost-free days | Average days without frost | FAO GAEZ |
| Sulphur mines | Dummy variable for whether there is sulphur mine. | Di Vita (1905) |
| Feudal, church-ruled, crown-ruled | Dummy variable coding the political organization within the town before the Unification of Ital. | Di Vita (1905) |
| Scale of the plantation | Dummy variable for the scale of the plantation.  Question: *Is the large, medium, or the small scale of the plantation prevalent?*  To be noticed that there is not a universal criterion to classify the scale. For example, the mayor of Caltagirone considers large a plantation extending for more than 2,000 hectares and small a plantation extending for less than 20 hectares. On the other hand the mayor of Paterno’ considers large a plantation extending over 50 hectares and small one extending over less than 1 hectare. Most of the times this difference reflects the extent of the town.  This difference is important because affects the answer on the fractionalization of land below. | Damiani (1886). Original surveys completed by mayors excepted for the Province of Caltanissetta for which we use the summary Report (Damiani). |
| Fractionalization of land | Dummy variable for the level of fractionalization of land.  Question: *What is the fractionalization of the land and which factors have affected it?*  As mentioned above this is affected by the classification of the scale of the plantation above. | Damiani (1886). Original surveys completed by mayors excepted for the Province of Caltanissetta for which we use the summary Report (Damiani). |
| Fractionalization of policies | Dummy variable coded one if policies aimed at increasing peasants’ ownership have been effective in fractionalizing the land. Policies considered are: Enfiteusi, Abolishment of Feudalism, and Privatization of the church’s assets.  Question: *Which factors have affected the fractionalization*? | Damiani (1886). Original surveys completed by mayors excepted for the Province of Caltanissetta for which we use the summary Report (Damiani). |

| Altitude and distance from the railway | Altitude above the sea level (in metres) and distance in km to the closer railway station. | Di Vita (1905). |
| --- | --- | --- |
| Rule of law | Dummy variable for the trust people have in the application of law.  Question: *Do people trust, mistrust, care or fear the law?* | Damiani (1886). Original Surveys completed by pretori. |
| Length of tenancy contract | Question: What is the average length of the tenancy contract?  In some cases, the mayor reports that the contract lasts for the entire life. In this case we assume an average life expectancy of 60 years and an average duration of the contract of 40 years. We also try with different numbers (20, 30, 50 years) but results do not change. | Damiani (1886). Original survey completed by mayors, exception made for the Province of Caltanissetta for which we use the summary Report (Damiani). |
| Mafia crimes | Number of mafia crimes reported to the police which are punishable according to the 416bis article of the Italian Penal Law. | National Institute for Statistics - ISTAT (1999) |
| Assets confiscated | Number of assets (i.e., apartments, buildings, etc.) confiscated from the mafia in the town | Agenzia del Demanio (2008) |
| Descriptions Variables for Section 6 | | |
| Mafia intensity | 1. Ordinal Variable on a 0–3 scale 2. Interpolated using an Inverse distance weight matrix | Cutrera (1900) |
| Suitability to crops (citrus, olive, wheat) | Tons per hectare (Agro-Climatic Suitability and productivity in tons per hectare). | FAO GAEZ |
| Altitude, inland water, soil workability constraints, soil fertility | These are measures of productivity and suitability of land to production. | FAO GAEZ |
| Net primary production | It is an index of vegetation which depends on land moisture and temperature. | FAO GAEZ |
| Distance from the coast | Spatial data on the distance from the sea. | NASA Ocean Biology  Processing Group |
| Soil neutrality | Soil ph generally an index around 6 (neutral) is the most suitable to production. | FAO GEONETWORK |
